# Supplementary material
Source: ML conference proceedings conference paper supplement (https://openaccess.thecvf.com/content/CVPR2026/html/Su_CapNav_Benchmarking_Vision_CVPR_2026_paper.html)
Supplement: Supplementary file 1 [file Su_CapNav_Benchmarking_Vision_CVPR_2026_supplemental.pdf]

# CapNav: Benchmarking Vision Language Models on Capability-conditioned Indoor Navigation

Xia Su\*

University of Washington  
Seattle, WA, USA

xiasu@cs.washington.edu

Ruiqi Chen\*

University of Washington  
Seattle, WA, USA

ruiqich@uw.edu

Benlin Liu

University of Washington  
Seattle, WA, USA

liubl@cs.washington.edu

Jingwei Ma

University of Washington  
Seattle, WA, USA

jingweim@cs.washington.edu

Zonglin Di

University of California, Santa Cruz  
Santa Cruz, CA, USA

zdi@ucsc.edu

Ranjay Krishna

University of Washington  
Seattle, WA, USA

ranjay@cs.washington.edu

Jon Froehlich

University of Washington  
Seattle, WA, USA

jonf@cs.washington.edu

## Overview of Supplementary Material

This supplementary material provides examples of VLM input and output in the dataset generation and benchmark evaluation process. We include the following components: (1) the exact prompts and input representations provided to VLMs, (2) examples of ground truth

### A. Task Generation

#### A.1 Prompt Template

We use a unified prompt template to instruct a VLM to generate navigation tasks for each scene. The template contains three components: (1) an overall instruction, (2) file attachments, *i.e.* a scene video and a guideline document that contains more detailed instructions (Sec A.2-3), and (3) a list of spatial nodes in the scene (Sec A.4).

An example of generated tasks can be found in `taskGeneration/HM3D00025_tasks.json`.

#### Instruction:

You are an expert benchmark question designer for the Capability-Conditioned Navigation Benchmark. You are provided with three materials:

1. A video showing the indoor environment.
2. A guideline PDF defining how to create navigation questions.
3. A list of valid scene nodes.

#### Requirements:

Please strictly follow the guideline and generate realistic, visually grounded, route-based navigation questions. Each question must:

- Include a start and end node with detailed in-room descriptions.
- Follow the schema structure provided by the system.
- Output a valid JSON array (no extra commentary).
- Ensure the total number of generated questions is  $\geq \{\text{min\_questions}\}$ .

#### External files (video, pdf)

#### Node List:

`{node_list_text}`

### A.2 Video Input

When generating navigation tasks, the VLM receives a touring video of the space. In Fig.1, we show representative frames of an example video. The full MP4 file is included in the supplementary ZIP, see `taskGeneration/HM3D00025.mp4`.

### A.3 Guideline Document

We provide a carefully designed guideline document to the VLM to specify the exact type and format of the navigation tasks to be generated. We show an excerpt of the document below. The complete guideline is included in the supple-

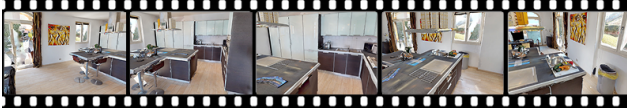

Figure 1. Representative frames from the input video HM3D00025.mp4. The VLM receives the complete MP4 video for navigation task generation.

mentary ZIP (taskGeneration/Generate\_Tasks\_Guidelines.pdf).

#### Guideline (excerpt):

Capability-conditioned navigability

##### 1. Goal

This guideline defines how to generate capability-neutral, route-based navigation questions for the Capability-Conditioned Navigation Benchmark. You are an AI model that generates route-based navigation questions from an indoor walkthrough video.

Your task is to create realistic and scene-consistent navigation tasks that test how [Agent] can move and act within the visible environment.

Each question must:

1. Be fully grounded in the video (only describe objects, rooms, and connections that actually appear).
2. Use the provided list of scene nodes as the only valid room-level landmarks.
- ...

Note: Full guideline PDF in the supplementary ZIP.

#### A.4 Node List

To ground the sub-spaces in a scene, the VLM also receives a list of node IDs paired with textual descriptions. We instruct the VLM to reference these nodes when generating navigation tasks. Below we show a few nodes from the scene HM3D00025, taken directly from the scene graph. The full JSON file is included in the supplementary ZIP (groundTruth/HM3D00025-graph.json).

#### Node List:

```
{
  node_117: Master bedroom foyer
```

```
node_118: Master bedroom bathroom
node_119: Master bedroom home office
node_120: Top floor stair landing and
hallway
...
node_131: First floor bedroom with
twin beds
node_132: First floor bathroom
}
```

Note: We show a subset of the nodes here. The model receives the full node list during task generation.

## B. Benchmark Evaluation

When evaluating on the CapNav benchmark, we query VLMs to answer the capability-conditioned navigation questions. Each query provides the following inputs:

1. a specific indoor scene shown as a tour video (see [Figure 1](#)),
2. all nodes of the scene’s navigation graph,
3. one navigation question,
4. one agent profile describing the mobility capabilities.

The model must use both the video and the text inputs to determine whether the agent can complete the navigation task. Below we show a prompt example for scene HM3D00025 and agent HUMANOID. The original prompt file can also be seen in benchmarkEvaluation/HM3D00025\_q01\_HUMANOID.txt

### B.1 Example Prompt (HM3D00025, HUMANOID)

#### Instruction:

You are an expert visual reasoning agent for indoor navigation tasks. You will receive four materials:

1. A video showing the indoor environment.
2. A single navigation question asking whether the agent can move from one area (node) to another.
3. The agent’s physical and capability profile.
4. The list of all nodes in this environment, with their textual descriptions (e.g., room type, furniture, width of passages).

Your goal is to determine whether the agent can successfully reach the destination area from the starting area, based on both the video and the textual descriptions. You must reason step by step about spatial constraints, obstacles, connectivity, and the agent’s mobility limitations.

#### Input:

### 1. Navigation Question:

Can [Agent] move from the dark sectional sofa area in the main living space to the white L-shaped sofa area in the first floor living room?

### 2. Agent Profile (HUMANOID):

```
Agent name: HUMANOID
Body shape: box
Height (m): 1.5
Width (m): 0.9
...
Can operate elevator: True
Can open the door: True
Description: Boston Dynamics Atlas humanoid robot approximately the size of a human, capable of obstacle crossing up to 0.4 m, for a single obstacle. However, it cannot go up stairs.
```

### 3. Scene Node List:

```
node_117 - Master bedroom foyer
node_118 - Master bedroom bathroom
node_119 - Master bedroom home office
...
node_131 - First floor bedroom with twin beds
node_132 - First floor bathroom
```

### 4. Video

(You can observe the video for spatial layout and obstacles.)

#### Task:

Your goal is to determine whether the agent can **navigate** from the start area to the goal area.

Focus exclusively on **movement feasibility**, considering physical dimensions, obstacle heights, and connection constraints.

You must **not stop after a single failed route attempt**. If one possible route is blocked (e.g., by stairs or narrow spaces), you must **actively consider all other possible paths** between the start and goal nodes in the scene graph.

Follow these principles:

1. Explore **all possible routes** through the scene graph before deciding the task is impossible. That means, try **multiple alternative routes** using all visible connections in the scene graph until you are confident that **no feasible route** exists.
2. Account for the agent's capabilities (e.g., door opening, elevator operation, stair traversal) when evaluating possible paths.

3. When multiple feasible paths exist, select the **most direct and realistic one** given the agent's capabilities.
4. If no route works, specify which **edge or physical barrier** prevents traversal and explain why.
5. If a feasible route exists, specify the **sequence of nodes** representing the navigable path.

Important:

If you initially find the route impossible, **re-examine the scene graph** and attempt at least two distinct alternative paths before concluding "no".

Your reasoning should reflect persistent exploration: do not assume failure after one obstacle; explore until all logical alternatives are ruled out.

You do not need to consider unrelated interactions (e.g., turning on lights, using computers, or touching furniture).

Please decide for each given question whether the agent can complete the navigation task.

If yes, provide a **feasible path** through the relevant nodes.

If no, specify the **edge (two connected nodes)** that blocks traversal and give a concise **reason** (e.g., too narrow passage, stairs, or closed door).

Your reasoning should always consider the agent's physical capabilities mentioned in the Agent profile (e.g., wheelchair cannot climb stairs, sweeper robot cannot open doors).

Return your answer in the required structured JSON format below.

#### Output Format (JSON only):

```
[
  ...
  {
    "question": "...",
    "agent": "HUMANOID",
    "result": {
      "answer": "no",
      "path": ["node_12",
               "node_14", "node_15"],
      "reason": "Too narrow
                 passage between the sofa
                 and wall"
    }
  }
]
```

Return only the JSON array, no explanation, comment, or markdown formatting.

## C. Reasoning Evaluation

CapNav deploys an LLM-as-judge method to evaluate whether a navigability explanation from a VLM's output is consistent with the ground-truth annotations. We provide the LLM judge with (1) the VLM-generated reasoning for why a path is non-traversable and (2) the full ground-truth traversability record for the path. The LLM will determine whether the explanation correctly captures the underlying failure conditions.

Below we briefly present the prompts and data formats. For a full example, please check `reasoningEvaluation / HM3D00025 _ q01 _ HUMANOID.txt`

### C.1 Prompt Template

#### Instruction (Reasoning Evaluation):

You are evaluating whether a navigation system's reasoning is correct.

You are given:

1. A system-generated explanation of why a path is not traversable.
2. The ground-truth traversability data for all edges along the path.

Your task:

- Determine if the system's reasoning correctly identifies or aligns with the actual traversability issues.
- Exact wording is not required; conceptual correctness is sufficient.
- Grant partial credit if the reasoning identifies some but not all issues.

Respond in JSON format with:

```
{
  "correct": true/false,
  "explanation": "Brief explanation
of why the reasoning is correct or
incorrect"
}
```

### C.2 Example Input (Excerpt)

#### Example Input (excerpt):

System reasoning:  
"The agent cannot traverse stairs, and the only path between the Basement bar space (node\_109) and the Laundry room (node\_105)

```
requires going up the Basement stairs
(node_114 or node_115),
which the agent cannot do."
```

Ground-truth traversability (excerpt):

```
{
  "total_edges": 6,
  "traversable": 4,
  "non_traversable": 2,
  "edges": [
    {
      "from": "node_109",
      "to": "node_108",
      "from_name": "Basement bar
space",
      "to_name": "Pool and media
room",
      "exists": true,
      "traversable": true,
      "note": "Edge from \"Basement
bar space\" to \"Pool and media
room\"",
      "ground_truth": {
        "exists": true,
        "traversable": true,
        "note": "Edge from \"Basement
bar space\" to \"Pool and
media room\""
      }
    },
    ...
  ]
}
```
